# Supplementary material for: Depression and Quality of Life in Patients with Gliomas: A Narrative Review
Source: MDPI journal article supplement (doi:10.3390/jcm11164811), 2022-08-17
Supplement: s1 [file s1]

Supplementary Table S1. Methodology and reporting assessment of the enrolled of the enrolled case-control studies.

| Studies          | Selection        |                     |                      | Comparability | Exposure factor measurement       |                                           |                  | Score |
|------------------|------------------|---------------------|----------------------|---------------|-----------------------------------|-------------------------------------------|------------------|-------|
|                  | Case appropriate | Case representative | Selection of control |               | Determination of exposure factors | Same method to determine exposure factors | No response rate |       |
| Walker AJ [85]   | Y                | Y                   | Y                    | Y             | N, N                              | Y                                         | Y                | 7     |
| Pottegård A [86] | Y                | Y                   | Y                    | Y             | N, N                              | Y                                         | Y                | 7     |

Y, criteria satisfied; N, criteria not satisfied.
